# Supplementary material for: Disinvestment in healthcare: an overview of HTA agencies and organizations activities at European level
Source: PubMed Central journal article supplement (PMC5831213; doi:10.1186/s12913-018-2941-0), 2018-03-01
Supplement: 12913_2018_2941_MOESM1_ESM.pdf [file 12913_2018_2941_MOESM1_ESM.pdf]

Table 1. List of HTA bodies and organizations belonging to INAHTA and EUnetHTA which have been consulted

| <b>Country</b> | <b>HTA agency</b>                                                                                                         | <b>INAHTA</b> | <b>EUNETHTA</b> |
|----------------|---------------------------------------------------------------------------------------------------------------------------|---------------|-----------------|
| AUSTRIA        | GÖG– Gesundheit Österreich GmbH                                                                                           | x             | x               |
|                | LBI-HTA– Ludwig Boltzmann Institute for Health Technology Assessment                                                      | x             | x               |
|                | HVB - Hauptverband der Österreichischen Sozialversicherungsträger (Association of Austrian Social Insurance Institutions) |               | x               |
| BELGIUM        | KCE– Belgian Health Care Knowledge Centre                                                                                 | x             | x               |
| BULGARIA       | NCPHP - National Center of Public Health Protection                                                                       |               | x               |
|                | NCPRMP - National Council for Pricing and Reimbursement of the Medicinal Products                                         |               | x               |
| CROATIA        | AAZ - Agency for Quality and Accreditation in Health Care and Social Welfare                                              |               | x               |
| CYPRUS         | MoH Cyprus - Ministry of Health of Cyprus                                                                                 |               | x               |
| CZECH REPUBLIC | MoH Cz Rep - Ministry of Health of the Czech Republic*                                                                    |               | x               |
| DENMARK        | HTA-HSR/DHTA– HTA & Health Services Research*                                                                             | x             |                 |
|                | DHMA - Danish Health and Medicines Authority                                                                              |               | x               |
|                | CFK - HTA and Health Services Research, Public Health and Quality Improvement, Central Denmark Region                     |               | x               |
| ESTONIA        | UTA - Department of Public Health of the University of Tartu                                                              |               |                 |
| FINLAND        | FinOHTA- Finnish Office for Health Technology Assessment                                                                  | x             |                 |
|                | FIMEA - Finnish Medicines Agency                                                                                          |               | x               |
|                | THL - National Institute for Health and Welfare                                                                           |               | x               |
| FRANCE         | CEDIT- Comité d'Evaluation et de Diffusion des Innovations Technologiques                                                 | x             |                 |
|                | HAS– Haute Autorité de Santé                                                                                              | x             | x               |
| GERMANY        | DAHTA @ DIMDI- German Agency for HTA at the German Institute for Medical Documentation and Information                    | x             | x               |
|                | G-BA– The Federal Joint Committee (Gemeinsamer Bundesausschuss)                                                           | x             |                 |
|                | IQWiG– Institut für Qualität und Wirtschaftlichkeit im Gesundheitswesen                                                   | x             | x               |
| GREECE         | NSPH - National School of Public Health                                                                                   |               | x               |
| HUNGARY        | OGYÉI - National Institute of Pharmacy and Nutrition                                                                      |               | x               |
| IRELAND        | HIQA– Health Information and Quality Authority                                                                            | x             | x               |
| ITALY          | Agenas- The Agency for Regional Healthcare                                                                                | x             | x               |
|                | ASSR– Agenzia Sanitaria e Sociale Regionale (Regional Agency for Health and Social Care)                                  | x             | x               |
|                | UVT– HTA Unit in A. Gemelli Teaching Hospital                                                                             | x             | x               |
|                | AIFA - Italian Medicines Agency                                                                                           |               | x               |
|                | Regione del Veneto                                                                                                        |               | x               |
| LATVIA         | NHS - National Health Service, NHS                                                                                        |               | x               |
| LITHUANIA      | VASPV– State Health Care Accreditation Agency under the Ministry of Health of the Republic of Lithuania                   | x             |                 |
|                | SMCA - State Medicines Control Agency under the Ministry of Health of the Republic of Lithuania                           |               | x               |
| LUXEMBOURG     | CEM– Inspection générale de la sécurité sociale (IGSS) Cellule d'expertise médicale                                       | x             |                 |
|                | CMSS - Administration du Contrôle Médical de la Sécurité Sociale                                                          |               | x               |
| MALTA          | MEH - Directorate for Pharmaceutical Affairs, Ministry for Energy and Health                                              |               | x               |
| NORWAY         | NOKC– Norwegian Knowledge Centre for the Health Services                                                                  | x             | x               |

|                 |                                                                                         |   |   |
|-----------------|-----------------------------------------------------------------------------------------|---|---|
| POLAND          | AHTAPol- Agency for Health Technology Assessment in Poland                              | x |   |
|                 | AOTMiT - Agency for Health Technology Assessment and Tariff System                      |   | x |
| PORTUGAL        | INFARMED - National Authority of Medicines and Health Products                          |   | x |
| ROMANIA         | NSPH MPD - National School of Public Health, Management and Professional Development    |   | x |
| SLOVAKIA        | MoH Slovak Republic - Ministry of Health of the Slovak Republic                         |   | x |
| SLOVENIA        | IER - Institute for Economic Research                                                   |   | x |
|                 | NIJZ - National Institute of Public Health of the Republic of Slovenia                  |   | x |
| SPAIN           | AETS - Agencia de Evaluación de Tecnologías Sanitarias                                  | x | x |
|                 | AETSA- Andalusian Agency for Health Technology Assessment                               | x |   |
|                 | AQuAS- Agència de Qualitat i Avaluació Sanitàries de Catalunya                          | x | x |
|                 | AVALIA-T- Galician Agency for Health Technology Assessment                              | x | x |
|                 | OSTEBA- Basque Office for Health Technology Assessment*                                 | x | x |
|                 | IACS- Aragon Health Sciences Institute                                                  |   | x |
|                 | ISC III - Instituto De Salud Carlos III                                                 |   | x |
|                 | SESCS - Evaluation AND Planning Unit - Directorate of the Canary Islands Health Service |   | x |
|                 | UETS - Health Technology Assessments Unit                                               |   | x |
| SWEDEN          | SBU- Swedish Council on Technology Assessment in Health Care                            | x |   |
| SWITZERLAND     | MTU-SFOPH- Medical Technology Unit – Swiss Federal Office of Public Health              | x |   |
|                 | SNHTA - Swiss Network for HTA                                                           |   | x |
| THE NETHERLANDS | ZonMw- The Netherlands Organisation for Health Research and Development                 | x |   |
|                 | ZIN- Zorginstituut Nederland                                                            | x | x |
| UNITED KINGDOM  | CRD- Centre for Reviews and Dissemination                                               | x |   |
|                 | HIS – Healthcare Improvement Scotland                                                   | x |   |
|                 | NIHR- National Institute for Health Research                                            | x |   |
|                 | NETSCC - NIHR, Evaluation, Trials and Studies Coordinating Centre, NETSCC               |   | x |
|                 | NICE - The National Institute for Health and Care Excellence                            |   | x |

\*: website was not accessible
